# Supplementary material for: Sensitivity towards elevated p CO 2 in great scallop ( Pecten maximus Lamarck) embryos and fed larvae
Source: Copernicus journal article supplement (doi:10.5194/bg-14-529-2017), 2017-02-03
Supplement: Supplementary file 1 [file bg-14-529-2017-supplement.zip]

| pH   | Tank | Unshelled larvae, day 2<br>(% of live number) | Protruded velum, day 3<br>(% of live number) |
|------|------|-----------------------------------------------|----------------------------------------------|
| 465  | c1   | 0.0                                           | 7.1                                          |
| 465  | c2   | 0.0                                           | 2.0                                          |
| 465  | c3   | 8.1                                           | 9.7                                          |
| 465  | c4   | 8.0                                           | 2.0                                          |
| 768  | c7   | 5.4                                           | 4.1                                          |
| 768  | c8   | 6.9                                           | 5.0                                          |
| 768  | c9   | 12.7                                          | 3.0                                          |
| 768  | c10  | 18.3                                          | 5.0                                          |
| 1294 | c5   | 29.1                                          | 36.4                                         |
| 1294 | c6   | 46.2                                          | 29.3                                         |
| 1294 | c11  | 15.1                                          | 38.4                                         |
| 1294 | c12  | 17.7                                          | 31.1                                         |

Number observed: 96- Number observed: 74-  
150 individuals 103 individuals
