# Supplementary material for: Sensitivity towards elevated p CO 2 in great scallop ( Pecten maximus Lamarck) embryos and fed larvae
Source: Copernicus journal article supplement (doi:10.5194/bg-14-529-2017), 2017-02-03
Supplement: Supplementary file 2 [file bg-14-529-2017-supplement.zip]

| Day | pH   | Tank | Shell Category (sum of Live individuals) |      |       |      |
|-----|------|------|------------------------------------------|------|-------|------|
|     |      |      | Normal                                   | Edge | Hinge | Both |
| 3   | 465  | c1   | 69                                       | 17   | 6     | 0    |
| 3   | 465  | c2   | 78                                       | 16   | 3     | 0    |
| 3   | 465  | c3   | 69                                       | 20   | 4     | 0    |
| 3   | 465  | c4   | 63                                       | 31   | 1     | 1    |
| 3   | 768  | c7   | 56                                       | 35   | 2     | 1    |
| 3   | 768  | c8   | 67                                       | 25   | 3     | 0    |
| 3   | 768  | c9   | 39                                       | 51   | 5     | 2    |
| 3   | 768  | c10  | 42                                       | 50   | 2     | 1    |
| 3   | 1294 | c5   | 12                                       | 15   | 29    | 7    |
| 3   | 1294 | c6   | 9                                        | 23   | 30    | 8    |
| 3   | 1294 | c11  | 10                                       | 34   | 11    | 6    |
| 3   | 1294 | c12  | 14                                       | 30   | 5     | 2    |
| 7   | 465  | c1   | 68                                       | 24   | 3     | 0    |
| 7   | 465  | c2   | 73                                       | 19   | 2     | 2    |
| 7   | 465  | c3   | 68                                       | 25   | 2     | 1    |
| 7   | 465  | c4   | 66                                       | 27   | 4     | 1    |
| 7   | 768  | c7   | 38                                       | 47   | 0     | 4    |
| 7   | 768  | c8   | 11                                       | 50   | 1     | 5    |
| 7   | 768  | c9   | 15                                       | 56   | 0     | 6    |
| 7   | 768  | c10  | 28                                       | 56   | 5     | 8    |
| 7   | 1294 | c5   | 8                                        | 35   | 10    | 26   |
| 7   | 1294 | c6   | 9                                        | 38   | 8     | 33   |
| 7   | 1294 | c11  | 0                                        | 73   | 0     | 21   |
| 7   | 1294 | c12  | 0                                        | 54   | 0     | 29   |
| 14  | 465  | c1   | 107                                      | 23   | 4     | 5    |
| 14  | 465  | c2   | 118                                      | 23   | 14    | 1    |
| 14  | 465  | c3   | 128                                      | 23   | 1     | 0    |
| 14  | 465  | c4   | 76                                       | 11   | 3     | 2    |
| 14  | 768  | c7   | 89                                       | 61   | 8     | 8    |
| 14  | 768  | c8   | 73                                       | 46   | 3     | 5    |
| 14  | 768  | c9   | 57                                       | 26   | 8     | 7    |
| 14  | 768  | c10  | 65                                       | 24   | 9     | 4    |
| 14  | 1294 | c5   | 18                                       | 29   | 15    | 31   |
| 14  | 1294 | c6   | 24                                       | 16   | 22    | 35   |
| 14  | 1294 | c11  | 61                                       | 69   | 21    | 25   |
| 14  | 1294 | c12  | 56                                       | 72   | 14    | 10   |

| Day | pH   | tank | Shell Category (sum of Dead individuals) |      |       |      |
|-----|------|------|------------------------------------------|------|-------|------|
|     |      |      | Normal                                   | Edge | Hinge | Both |
| 14  | 465  | c1   | 18                                       | 32   | 3     | 9    |
| 14  | 465  | c2   | 38                                       | 20   | 3     | 2    |
| 14  | 465  | c3   | 108                                      | 66   | 2     | 5    |
| 14  | 465  | c4   | 67                                       | 39   | 4     | 3    |
| 14  | 768  | c7   | 40                                       | 56   | 7     | 12   |
| 14  | 768  | c8   | 30                                       | 44   | 2     | 9    |
| 14  | 768  | c9   | 24                                       | 36   | 2     | 7    |
| 14  | 768  | c10  | 26                                       | 35   | 1     | 6    |
| 14  | 1294 | c5   | 8                                        | 7    | 9     | 5    |
| 14  | 1294 | c6   | 6                                        | 19   | 1     | 7    |
| 14  | 1294 | c11  | 13                                       | 25   | 9     | 4    |
| 14  | 1294 | c12  | 19                                       | 47   | 0     | 3    |
