# Supplementary material for: Sensitivity towards elevated p CO 2 in great scallop ( Pecten maximus Lamarck) embryos and fed larvae
Source: Copernicus journal article supplement (doi:10.5194/bg-14-529-2017), 2017-02-03
Supplement: Supplementary file 3 [file bg-14-529-2017-supplement.zip]

|  |  |  |  |  |  |  |
|--|--|--|--|--|--|--|
|  |  |  |  |  |  |  |
|  |  |  |  |  |  |  |
|  |  |  |  |  |  |  |
|  |  |  |  |  |  |  |
|  |  |  |  |  |  |  |
|  |  |  |  |  |  |  |
