# Supplementary material for: Sensitivity towards elevated p CO 2 in great scallop ( Pecten maximus Lamarck) embryos and fed larvae
Source: Copernicus journal article supplement (doi:10.5194/bg-14-529-2017), 2017-02-03
Supplement: Supplementary file 4 [file bg-14-529-2017-supplement.zip]

| Day | $p\text{ CO}_2$ ( $\mu\text{atm}$ ) | Tank | Survival % |
|-----|-------------------------------------|------|------------|
| 3   | 465                                 | c1   | 29.1       |
| 3   | 465                                 | c2   | 29.7       |
| 3   | 465                                 | c3   | 31.2       |
| 3   | 465                                 | c4   | 28.2       |
| 3   | 768                                 | c10  | 31.0       |
| 3   | 768                                 | c7   | 24.7       |
| 3   | 768                                 | c8   | 22.4       |
| 3   | 768                                 | c9   | 32.3       |
| 3   | 1294                                | c11  | 37.0       |
| 3   | 1294                                | c12  | 21.4       |
| 3   | 1294                                | c5   | 36.1       |
| 3   | 1294                                | c6   | 29.8       |
| 7   | 465                                 | c1   | 22.8       |
| 7   | 465                                 | c2   | 26.6       |
| 7   | 465                                 | c3   | 12.9       |
| 7   | 465                                 | c4   | 21.8       |
| 7   | 768                                 | c10  | 15.7       |
| 7   | 768                                 | c7   | 17.4       |
| 7   | 768                                 | c8   | 16.2       |
| 7   | 768                                 | c9   | 16.2       |
| 7   | 1294                                | c11  | 5.2        |
| 7   | 1294                                | c12  | 5.6        |
| 7   | 1294                                | c5   | 9.3        |
| 7   | 1294                                | c6   | 9.2        |
| 14  | 465                                 | c1   | 20.5       |
| 14  | 465                                 | c2   | 24.2       |
| 14  | 465                                 | c3   | 12.4       |
| 14  | 465                                 | c4   | 15.6       |
| 14  | 768                                 | c10  | 16.3       |
| 14  | 768                                 | c7   | 13.2       |
| 14  | 768                                 | c8   | 21.1       |
| 14  | 768                                 | c9   | 8.8        |
| 14  | 1294                                | c11  | 2.1        |
| 14  | 1294                                | c12  | 1.7        |
| 14  | 1294                                | c5   | 5.2        |
| 14  | 1294                                | c6   | 3.5        |
