# Supplementary material for: Sensitivity towards elevated p CO 2 in great scallop ( Pecten maximus Lamarck) embryos and fed larvae
Source: Copernicus journal article supplement (doi:10.5194/bg-14-529-2017), 2017-02-03
Supplement: Supplementary file 5 [file bg-14-529-2017-supplement.zip]

| $p\text{ CO}_2$ | Median              |                     |                      | Quartiles minus     |                     |                      | Quartiles plus      |                     |                      |
|-----------------|---------------------|---------------------|----------------------|---------------------|---------------------|----------------------|---------------------|---------------------|----------------------|
|                 | 465 $\mu\text{atm}$ | 768 $\mu\text{atm}$ | 1294 $\mu\text{atm}$ | 465 $\mu\text{atm}$ | 768 $\mu\text{atm}$ | 1294 $\mu\text{atm}$ | 465 $\mu\text{atm}$ | 768 $\mu\text{atm}$ | 1294 $\mu\text{atm}$ |
| Unshelled       |                     |                     |                      |                     |                     |                      |                     |                     |                      |
| d2              | 4.0                 | 9.8                 | 23.4                 | 4.0                 | 3.7                 | 7.0                  | 4.1                 | 5.7                 | 14.3                 |
| Protruded       |                     |                     |                      |                     |                     |                      |                     |                     |                      |
| velum d3        | 4.6                 | 4.5                 | 33.7                 | 2.5                 | 1.0                 | 3.5                  | 3.8                 | 0.5                 | 3.7                  |
