# Supplementary material for: Sensitivity towards elevated p CO 2 in great scallop ( Pecten maximus Lamarck) embryos and fed larvae
Source: Copernicus journal article supplement (doi:10.5194/bg-14-529-2017), 2017-02-03
Supplement: Supplementary file 6 [file bg-14-529-2017-supplement.zip]

| Group       | $p\text{CO}_2$ | normal | edge | hinge | both |
|-------------|----------------|--------|------|-------|------|
| Day 3 live  | 465            | 73.8   | 22.2 | 3.7   | 0.3  |
| Day 3 live  | 768            | 53.5   | 42.3 | 3.1   | 1.0  |
| Day 3 live  | 1294           | 18.4   | 41.6 | 30.6  | 9.4  |
| Day 7 live  | 465            | 71.4   | 24.7 | 2.9   | 1.0  |
| Day 7 live  | 768            | 27.9   | 63.3 | 1.8   | 7.0  |
| Day 7 live  | 1294           | 4.9    | 58.1 | 5.2   | 31.7 |
| Day 14 live | 465            | 79.6   | 14.8 | 4.1   | 1.5  |
| Day 14 live | 768            | 57.6   | 31.8 | 5.7   | 4.9  |
| Day 14 live | 1294           | 30.7   | 35.9 | 13.9  | 19.5 |
| Day 14 dead | 465            | 55.1   | 37.5 | 2.9   | 4.5  |
| Day 14 dead | 768            | 35.6   | 50.7 | 3.6   | 10.1 |
| Day 14 dead | 1294           | 25.3   | 53.8 | 10.4  | 10.4 |
