# Supplementary material for: Sensitivity towards elevated p CO 2 in great scallop ( Pecten maximus Lamarck) embryos and fed larvae
Source: Copernicus journal article supplement (doi:10.5194/bg-14-529-2017), 2017-02-03
Supplement: Supplementary file 7 [file bg-14-529-2017-supplement.zip]

SW) seawater

|                          |     |          |       | Temp   | A <sub>T</sub> | pH <sub>NBS</sub> | <i>p</i> CO <sub>2</sub> | HCO <sub>3</sub> <sup>-</sup> | CO <sub>3</sub> <sup>2-</sup> | CO <sub>2</sub> | Ω <sub>Ar</sub> | CO <sub>2</sub> |
|--------------------------|-----|----------|-------|--------|----------------|-------------------|--------------------------|-------------------------------|-------------------------------|-----------------|-----------------|-----------------|
| <i>p</i> CO <sub>2</sub> |     |          |       | (mmol/ |                |                   | (μmol/                   | (μmol/                        | (μmol/                        |                 |                 |                 |
| Tank group               | Day | Salinity | (°C)  | kgSW)  |                | (μatm)            | kgSW)                    | kgSW)                         | kgSW)                         | (ppm)           |                 |                 |
| c1                       | 465 | 0        | 35.10 | 15.50  | 2322           | 7.95              | <b>456</b>               | 1959                          | 145.5                         | 16.8            | 1.91            | 464             |
| c1                       | 465 | 1        | 35.10 | 15.55  | 2322           | 7.95              | <b>456</b>               | 1959                          | 145.7                         | 16.7            | 1.91            | 464             |
| c1                       | 465 | 2        | 35.10 | 15.45  | 2322           | 7.94              | <b>469</b>               | 1967                          | 142.5                         | 17.2            | 1.87            | 477             |
| c1                       | 465 | 3        | 35.10 | 15.55  | 2322           | 7.94              | <b>469</b>               | 1966                          | 143.0                         | 17.2            | 1.87            | 477             |
| c1                       | 465 | 4        | 35.10 | 15.37  | 2322           | 7.94              | <b>469</b>               | 1968                          | 142.1                         | 17.3            | 1.86            | 477             |
| c1                       | 465 | 5        | 35.10 | 15.38  | 2322           | 7.94              | <b>469</b>               | 1968                          | 142.1                         | 17.3            | 1.86            | 477             |
| c1                       | 465 | 6        | 35.10 | 15.54  | 2322           | 7.95              | <b>456</b>               | 1959                          | 145.7                         | 16.8            | 1.91            | 464             |
| c1                       | 465 | 7        | 35.10 | 15.44  | 2322           | 7.94              | <b>469</b>               | 1967                          | 142.4                         | 17.3            | 1.87            | 477             |
| c1                       | 465 | 8        | 35.10 | 15.53  | 2322           | 7.94              | <b>469</b>               | 1966                          | 142.9                         | 17.2            | 1.87            | 477             |
| c1                       | 465 | 9        | 35.10 | 15.45  | 2322           | 7.94              | <b>469</b>               | 1967                          | 142.5                         | 17.2            | 1.87            | 477             |
| c1                       | 465 | 10       | 35.10 | 15.48  | 2322           | 7.94              | <b>469</b>               | 1967                          | 142.6                         | 17.2            | 1.87            | 477             |
| c1                       | 465 | 11       | 35.10 | 15.50  | 2322           | 7.93              | <b>481</b>               | 1973                          | 140.0                         | 17.7            | 1.83            | 490             |
| c1                       | 465 | 12       | 35.10 | 15.70  | 2322           | 7.93              | <b>482</b>               | 1971                          | 140.9                         | 17.6            | 1.85            | 490             |
| c1                       | 465 | 13       | 35.10 | 15.60  | 2322           | 7.94              | <b>469</b>               | 1965                          | 143.2                         | 17.2            | 1.88            | 477             |
| c1                       | 465 | 14       | 35.10 | 15.50  | 2322           | 7.94              | <b>469</b>               | 1966                          | 142.7                         | 17.2            | 1.87            | 477             |
| c2                       | 465 | 0        | 35.10 | 15.50  | 2322           | 7.95              | <b>456</b>               | 1959                          | 145.5                         | 16.8            | 1.91            | 464             |
| c2                       | 465 | 1        | 35.10 | 15.55  | 2322           | 7.95              | <b>456</b>               | 1959                          | 145.7                         | 16.7            | 1.91            | 464             |
| c2                       | 465 | 2        | 35.10 | 15.45  | 2322           | 7.94              | <b>469</b>               | 1967                          | 142.5                         | 17.2            | 1.87            | 477             |
| c2                       | 465 | 3        | 35.10 | 15.55  | 2322           | 7.94              | <b>469</b>               | 1966                          | 143.0                         | 17.2            | 1.87            | 477             |
| c2                       | 465 | 4        | 35.10 | 15.37  | 2322           | 7.95              | <b>456</b>               | 1961                          | 144.9                         | 16.8            | 1.90            | 464             |
| c2                       | 465 | 5        | 35.10 | 15.38  | 2322           | 7.94              | <b>469</b>               | 1968                          | 142.1                         | 17.3            | 1.86            | 477             |
| c2                       | 465 | 6        | 35.10 | 15.54  | 2322           | 7.94              | <b>469</b>               | 1966                          | 142.9                         | 17.2            | 1.87            | 477             |
| c2                       | 465 | 7        | 35.10 | 15.44  | 2322           | 7.94              | <b>469</b>               | 1967                          | 142.4                         | 17.3            | 1.87            | 477             |
| c2                       | 465 | 8        | 35.10 | 15.53  | 2322           | 7.94              | <b>469</b>               | 1966                          | 142.9                         | 17.2            | 1.87            | 477             |
| c2                       | 465 | 9        | 35.10 | 15.45  | 2322           | 7.94              | <b>469</b>               | 1967                          | 142.5                         | 17.2            | 1.87            | 477             |
| c2                       | 465 | 10       | 35.10 | 15.48  | 2322           | 7.94              | <b>469</b>               | 1967                          | 142.6                         | 17.2            | 1.87            | 477             |
| c2                       | 465 | 11       | 35.10 | 15.50  | 2322           | 7.93              | <b>481</b>               | 1973                          | 140.0                         | 17.7            | 1.83            | 490             |
| c2                       | 465 | 12       | 35.10 | 15.70  | 2322           | 7.93              | <b>482</b>               | 1971                          | 140.9                         | 17.6            | 1.85            | 490             |
| c2                       | 465 | 13       | 35.10 | 15.60  | 2322           | 7.94              | <b>469</b>               | 1965                          | 143.2                         | 17.2            | 1.88            | 477             |
| c2                       | 465 | 14       | 35.10 | 15.50  | 2322           | 7.93              | <b>481</b>               | 1973                          | 140.0                         | 17.7            | 1.83            | 490             |
| c3                       | 465 | 0        | 35.10 | 15.50  | 2322           | 7.96              | <b>444</b>               | 1952                          | 148.4                         | 16.3            | 1.94            | 452             |
| c3                       | 465 | 1        | 35.10 | 15.55  | 2322           | 7.96              | <b>444</b>               | 1952                          | 148.6                         | 16.3            | 1.95            | 452             |
| c3                       | 465 | 2        | 35.10 | 15.45  | 2322           | 7.95              | <b>456</b>               | 1960                          | 145.3                         | 16.8            | 1.90            | 464             |
| c3                       | 465 | 3        | 35.10 | 15.55  | 2322           | 7.95              | <b>456</b>               | 1959                          | 145.8                         | 16.7            | 1.91            | 464             |
| c3                       | 465 | 4        | 35.10 | 15.37  | 2322           | 7.95              | <b>456</b>               | 1961                          | 144.9                         | 16.8            | 1.90            | 464             |
| c3                       | 465 | 5        | 35.10 | 15.38  | 2322           | 7.94              | <b>469</b>               | 1968                          | 142.1                         | 17.3            | 1.86            | 477             |
| c3                       | 465 | 6        | 35.10 | 15.54  | 2322           | 7.95              | <b>456</b>               | 1959                          | 145.7                         | 16.8            | 1.91            | 464             |
| c3                       | 465 | 7        | 35.10 | 15.44  | 2322           | 7.94              | <b>469</b>               | 1967                          | 142.4                         | 17.3            | 1.87            | 477             |
| c3                       | 465 | 8        | 35.10 | 15.53  | 2322           | 7.94              | <b>469</b>               | 1966                          | 142.9                         | 17.2            | 1.87            | 477             |
| c3                       | 465 | 9        | 35.10 | 15.45  | 2322           | 7.94              | <b>469</b>               | 1967                          | 142.5                         | 17.2            | 1.87            | 477             |
| c3                       | 465 | 10       | 35.10 | 15.48  | 2322           | 7.95              | <b>456</b>               | 1960                          | 145.4                         | 16.8            | 1.91            | 464             |
| c3                       | 465 | 11       | 35.10 | 15.50  | 2322           | 7.94              | <b>469</b>               | 1966                          | 142.7                         | 17.2            | 1.87            | 477             |
| c3                       | 465 | 12       | 35.10 | 15.70  | 2322           | 7.93              | <b>482</b>               | 1971                          | 140.9                         | 17.6            | 1.85            | 490             |
| c3                       | 465 | 13       | 35.10 | 15.60  | 2322           | 7.93              | <b>481</b>               | 1972                          | 140.4                         | 17.6            | 1.84            | 490             |
| c3                       | 465 | 14       | 35.10 | 15.50  | 2322           | 7.94              | <b>469</b>               | 1966                          | 142.7                         | 17.2            | 1.87            | 477             |

|     |     |    |       |       |      |      |            |      |       |      |      |     |
|-----|-----|----|-------|-------|------|------|------------|------|-------|------|------|-----|
| c4  | 465 | 0  | 35.10 | 15.50 | 2322 | 7.96 | <b>444</b> | 1952 | 148.4 | 16.3 | 1.94 | 452 |
| c4  | 465 | 1  | 35.10 | 15.55 | 2322 | 7.96 | <b>444</b> | 1952 | 148.6 | 16.3 | 1.95 | 452 |
| c4  | 465 | 2  | 35.10 | 15.45 | 2322 | 7.95 | <b>456</b> | 1960 | 145.3 | 16.8 | 1.90 | 464 |
| c4  | 465 | 3  | 35.10 | 15.55 | 2322 | 7.95 | <b>456</b> | 1959 | 145.8 | 16.7 | 1.91 | 464 |
| c4  | 465 | 4  | 35.10 | 15.37 | 2322 | 7.95 | <b>456</b> | 1961 | 144.9 | 16.8 | 1.90 | 464 |
| c4  | 465 | 5  | 35.10 | 15.38 | 2322 | 7.95 | <b>456</b> | 1961 | 144.9 | 16.8 | 1.90 | 464 |
| c4  | 465 | 6  | 35.10 | 15.54 | 2322 | 7.95 | <b>456</b> | 1959 | 145.7 | 16.8 | 1.91 | 464 |
| c4  | 465 | 7  | 35.10 | 15.44 | 2322 | 7.95 | <b>456</b> | 1960 | 145.2 | 16.8 | 1.90 | 464 |
| c4  | 465 | 8  | 35.10 | 15.53 | 2322 | 7.95 | <b>456</b> | 1959 | 145.7 | 16.8 | 1.91 | 464 |
| c4  | 465 | 9  | 35.10 | 15.45 | 2322 | 7.95 | <b>456</b> | 1960 | 145.3 | 16.8 | 1.90 | 464 |
| c4  | 465 | 10 | 35.10 | 15.48 | 2322 | 7.94 | <b>469</b> | 1967 | 142.6 | 17.2 | 1.87 | 477 |
| c4  | 465 | 11 | 35.10 | 15.50 | 2322 | 7.94 | <b>469</b> | 1966 | 142.7 | 17.2 | 1.87 | 477 |
| c4  | 465 | 12 | 35.10 | 15.70 | 2322 | 7.94 | <b>469</b> | 1964 | 143.6 | 17.1 | 1.88 | 477 |
| c4  | 465 | 13 | 35.10 | 15.60 | 2322 | 7.94 | <b>469</b> | 1965 | 143.2 | 17.2 | 1.88 | 477 |
| c4  | 465 | 14 | 35.10 | 15.50 | 2322 | 7.94 | <b>469</b> | 1966 | 142.7 | 17.2 | 1.87 | 477 |
| c10 | 768 | 0  | 35.10 | 15.50 | 2322 | 7.77 | <b>729</b> | 2069 | 101.5 | 26.8 | 1.33 | 742 |
| c10 | 768 | 1  | 35.10 | 15.61 | 2322 | 7.77 | <b>730</b> | 2068 | 101.9 | 26.7 | 1.34 | 743 |
| c10 | 768 | 2  | 35.10 | 15.62 | 2322 | 7.74 | <b>788</b> | 2083 | 95.8  | 28.8 | 1.26 | 801 |
| c10 | 768 | 3  | 35.10 | 15.72 | 2322 | 7.74 | <b>788</b> | 2082 | 96.2  | 28.8 | 1.26 | 802 |
| c10 | 768 | 4  | 35.10 | 15.44 | 2322 | 7.74 | <b>787</b> | 2085 | 95.2  | 29.0 | 1.25 | 801 |
| c10 | 768 | 5  | 35.10 | 15.35 | 2322 | 7.74 | <b>787</b> | 2085 | 94.9  | 29.0 | 1.24 | 800 |
| c10 | 768 | 6  | 35.10 | 15.53 | 2322 | 7.74 | <b>787</b> | 2084 | 95.5  | 28.9 | 1.25 | 801 |
| c10 | 768 | 7  | 35.10 | 15.43 | 2322 | 7.74 | <b>787</b> | 2085 | 95.2  | 29.0 | 1.25 | 801 |
| c10 | 768 | 8  | 35.10 | 15.53 | 2322 | 7.74 | <b>787</b> | 2084 | 95.5  | 28.9 | 1.25 | 801 |
| c10 | 768 | 9  | 35.10 | 15.44 | 2322 | 7.74 | <b>787</b> | 2085 | 95.2  | 29.0 | 1.25 | 801 |
| c10 | 768 | 10 | 35.10 | 15.47 | 2322 | 7.75 | <b>768</b> | 2079 | 97.3  | 28.2 | 1.28 | 781 |
| c10 | 768 | 11 | 35.10 | 15.50 | 2322 | 7.73 | <b>808</b> | 2089 | 93.5  | 29.7 | 1.23 | 822 |
| c10 | 768 | 12 | 35.10 | 15.70 | 2322 | 7.75 | <b>768</b> | 2078 | 98.1  | 28.1 | 1.29 | 782 |
| c10 | 768 | 13 | 35.10 | 15.60 | 2322 | 7.76 | <b>749</b> | 2073 | 99.8  | 27.4 | 1.31 | 762 |
| c10 | 768 | 14 | 35.10 | 15.50 | 2322 | 7.74 | <b>787</b> | 2084 | 95.4  | 28.9 | 1.25 | 801 |
| c9  | 768 | 0  | 35.10 | 15.50 | 2322 | 7.78 | <b>711</b> | 2064 | 103.6 | 26.1 | 1.36 | 723 |
| c9  | 768 | 1  | 35.10 | 15.61 | 2322 | 7.78 | <b>711</b> | 2063 | 104.0 | 26.1 | 1.36 | 724 |
| c9  | 768 | 2  | 35.10 | 15.62 | 2322 | 7.73 | <b>808</b> | 2088 | 93.9  | 29.6 | 1.23 | 822 |
| c9  | 768 | 3  | 35.10 | 15.72 | 2322 | 7.74 | <b>788</b> | 2082 | 96.2  | 28.8 | 1.26 | 802 |
| c9  | 768 | 4  | 35.10 | 15.44 | 2322 | 7.75 | <b>767</b> | 2080 | 97.2  | 28.3 | 1.27 | 781 |
| c9  | 768 | 5  | 35.10 | 15.35 | 2322 | 7.74 | <b>787</b> | 2085 | 94.9  | 29.0 | 1.24 | 800 |
| c9  | 768 | 6  | 35.10 | 15.53 | 2322 | 7.74 | <b>787</b> | 2084 | 95.5  | 28.9 | 1.25 | 801 |
| c9  | 768 | 7  | 35.10 | 15.43 | 2322 | 7.74 | <b>787</b> | 2085 | 95.2  | 29.0 | 1.25 | 801 |
| c9  | 768 | 8  | 35.10 | 15.53 | 2322 | 7.74 | <b>787</b> | 2084 | 95.5  | 28.9 | 1.25 | 801 |
| c9  | 768 | 9  | 35.10 | 15.44 | 2322 | 7.74 | <b>787</b> | 2085 | 95.2  | 29.0 | 1.25 | 801 |
| c9  | 768 | 10 | 35.10 | 15.47 | 2322 | 7.75 | <b>768</b> | 2079 | 97.3  | 28.2 | 1.28 | 781 |
| c9  | 768 | 11 | 35.10 | 15.50 | 2322 | 7.75 | <b>768</b> | 2079 | 97.4  | 28.2 | 1.28 | 781 |
| c9  | 768 | 12 | 35.10 | 15.70 | 2322 | 7.75 | <b>768</b> | 2078 | 98.1  | 28.1 | 1.29 | 782 |
| c9  | 768 | 13 | 35.10 | 15.60 | 2322 | 7.76 | <b>749</b> | 2073 | 99.8  | 27.4 | 1.31 | 762 |
| c9  | 768 | 14 | 35.10 | 15.50 | 2322 | 7.75 | <b>768</b> | 2079 | 97.4  | 28.2 | 1.28 | 781 |
| c8  | 768 | 0  | 35.10 | 15.50 | 2322 | 7.77 | <b>729</b> | 2069 | 101.5 | 26.8 | 1.33 | 742 |
| c8  | 768 | 1  | 35.10 | 15.61 | 2322 | 7.77 | <b>730</b> | 2068 | 101.9 | 26.7 | 1.34 | 743 |
| c8  | 768 | 2  | 35.10 | 15.62 | 2322 | 7.75 | <b>768</b> | 2078 | 97.8  | 28.1 | 1.28 | 781 |
| c8  | 768 | 3  | 35.10 | 15.72 | 2322 | 7.75 | <b>768</b> | 2077 | 98.2  | 28.0 | 1.29 | 782 |
| c8  | 768 | 4  | 35.10 | 15.44 | 2322 | 7.74 | <b>787</b> | 2085 | 95.2  | 29.0 | 1.25 | 801 |

|    |      |    |       |       |      |      |             |      |       |      |      |      |
|----|------|----|-------|-------|------|------|-------------|------|-------|------|------|------|
| c8 | 768  | 5  | 35.10 | 15.35 | 2322 | 7.75 | <b>767</b>  | 2080 | 96.9  | 28.3 | 1.27 | 780  |
| c8 | 768  | 6  | 35.10 | 15.53 | 2322 | 7.76 | <b>748</b>  | 2074 | 99.6  | 27.5 | 1.31 | 761  |
| c8 | 768  | 7  | 35.10 | 15.43 | 2322 | 7.75 | <b>767</b>  | 2080 | 97.2  | 28.3 | 1.27 | 781  |
| c8 | 768  | 8  | 35.10 | 15.53 | 2322 | 7.75 | <b>768</b>  | 2079 | 97.5  | 28.2 | 1.28 | 781  |
| c8 | 768  | 9  | 35.10 | 15.44 | 2322 | 7.75 | <b>767</b>  | 2080 | 97.2  | 28.3 | 1.27 | 781  |
| c8 | 768  | 10 | 35.10 | 15.47 | 2322 | 7.75 | <b>768</b>  | 2079 | 97.3  | 28.2 | 1.28 | 781  |
| c8 | 768  | 11 | 35.10 | 15.50 | 2322 | 7.75 | <b>768</b>  | 2079 | 97.4  | 28.2 | 1.28 | 781  |
| c8 | 768  | 12 | 35.10 | 15.70 | 2322 | 7.74 | <b>788</b>  | 2083 | 96.1  | 28.8 | 1.26 | 802  |
| c8 | 768  | 13 | 35.10 | 15.60 | 2322 | 7.74 | <b>788</b>  | 2083 | 95.8  | 28.9 | 1.26 | 801  |
| c8 | 768  | 14 | 35.10 | 15.50 | 2322 | 7.76 | <b>748</b>  | 2074 | 99.5  | 27.5 | 1.30 | 761  |
| c7 | 768  | 0  | 35.10 | 15.50 | 2322 | 7.78 | <b>711</b>  | 2064 | 103.6 | 26.1 | 1.36 | 723  |
| c7 | 768  | 1  | 35.10 | 15.61 | 2322 | 7.78 | <b>711</b>  | 2063 | 104.0 | 26.1 | 1.36 | 724  |
| c7 | 768  | 2  | 35.10 | 15.62 | 2322 | 7.75 | <b>768</b>  | 2078 | 97.8  | 28.1 | 1.28 | 781  |
| c7 | 768  | 3  | 35.10 | 15.72 | 2322 | 7.75 | <b>768</b>  | 2077 | 98.2  | 28.0 | 1.29 | 782  |
| c7 | 768  | 4  | 35.10 | 15.44 | 2322 | 7.75 | <b>767</b>  | 2080 | 97.2  | 28.3 | 1.27 | 781  |
| c7 | 768  | 5  | 35.10 | 15.35 | 2322 | 7.75 | <b>767</b>  | 2080 | 96.9  | 28.3 | 1.27 | 780  |
| c7 | 768  | 6  | 35.10 | 15.53 | 2322 | 7.75 | <b>768</b>  | 2079 | 97.5  | 28.2 | 1.28 | 781  |
| c7 | 768  | 7  | 35.10 | 15.43 | 2322 | 7.75 | <b>767</b>  | 2080 | 97.2  | 28.3 | 1.27 | 781  |
| c7 | 768  | 8  | 35.10 | 15.53 | 2322 | 7.75 | <b>768</b>  | 2079 | 97.5  | 28.2 | 1.28 | 781  |
| c7 | 768  | 9  | 35.10 | 15.44 | 2322 | 7.74 | <b>787</b>  | 2085 | 95.2  | 29.0 | 1.25 | 801  |
| c7 | 768  | 10 | 35.10 | 15.47 | 2322 | 7.76 | <b>748</b>  | 2074 | 99.4  | 27.5 | 1.30 | 761  |
| c7 | 768  | 11 | 35.10 | 15.50 | 2322 | 7.75 | <b>768</b>  | 2079 | 97.4  | 28.2 | 1.28 | 781  |
| c7 | 768  | 12 | 35.10 | 15.70 | 2322 | 7.75 | <b>768</b>  | 2078 | 98.1  | 28.1 | 1.29 | 782  |
| c7 | 768  | 13 | 35.10 | 15.60 | 2322 | 7.74 | <b>788</b>  | 2083 | 95.8  | 28.9 | 1.26 | 801  |
| c7 | 768  | 14 | 35.10 | 15.50 | 2322 | 7.75 | <b>768</b>  | 2079 | 97.4  | 28.2 | 1.28 | 781  |
| c5 | 1294 | 0  | 35.10 | 15.50 | 2322 | 7.54 | <b>1297</b> | 2166 | 62.6  | 47.7 | 0.82 | 1319 |
| c5 | 1294 | 1  | 35.10 | 15.45 | 2322 | 7.54 | <b>1297</b> | 2166 | 62.5  | 47.7 | 0.82 | 1319 |
| c5 | 1294 | 2  | 35.10 | 15.54 | 2322 | 7.53 | <b>1329</b> | 2169 | 61.3  | 48.8 | 0.80 | 1353 |
| c5 | 1294 | 3  | 35.10 | 15.68 | 2322 | 7.50 | <b>1432</b> | 2178 | 57.8  | 52.3 | 0.76 | 1457 |
| c5 | 1294 | 4  | 35.10 | 15.42 | 2322 | 7.51 | <b>1395</b> | 2176 | 58.5  | 51.4 | 0.77 | 1419 |
| c5 | 1294 | 5  | 35.10 | 15.33 | 2322 | 7.52 | <b>1361</b> | 2173 | 59.6  | 50.3 | 0.78 | 1384 |
| c5 | 1294 | 6  | 35.10 | 15.54 | 2322 | 7.53 | <b>1329</b> | 2169 | 61.3  | 48.8 | 0.80 | 1353 |
| c5 | 1294 | 7  | 35.10 | 15.41 | 2322 | 7.53 | <b>1329</b> | 2170 | 61.1  | 49.0 | 0.80 | 1351 |
| c5 | 1294 | 8  | 35.10 | 15.47 | 2322 | 7.54 | <b>1297</b> | 2166 | 62.5  | 47.7 | 0.82 | 1319 |
| c5 | 1294 | 9  | 35.10 | 15.36 | 2322 | 7.53 | <b>1328</b> | 2170 | 60.9  | 49.0 | 0.80 | 1351 |
| c5 | 1294 | 10 | 35.10 | 15.33 | 2322 | 7.53 | <b>1328</b> | 2170 | 60.9  | 49.1 | 0.80 | 1351 |
| c5 | 1294 | 11 | 35.10 | 15.50 | 2322 | 7.53 | <b>1329</b> | 2169 | 61.3  | 48.8 | 0.80 | 1352 |
| c5 | 1294 | 12 | 35.10 | 15.70 | 2322 | 7.54 | <b>1298</b> | 2165 | 63.0  | 47.4 | 0.83 | 1321 |
| c5 | 1294 | 13 | 35.10 | 15.60 | 2322 | 7.53 | <b>1330</b> | 2169 | 61.5  | 48.7 | 0.81 | 1353 |
| c5 | 1294 | 14 | 35.10 | 15.50 | 2322 | 7.55 | <b>1265</b> | 2163 | 63.9  | 46.5 | 0.84 | 1287 |
| c6 | 1294 | 0  | 35.10 | 15.50 | 2322 | 7.56 | <b>1235</b> | 2159 | 65.3  | 45.4 | 0.86 | 1256 |
| c6 | 1294 | 1  | 35.10 | 15.45 | 2322 | 7.56 | <b>1234</b> | 2159 | 65.2  | 45.4 | 0.85 | 1256 |
| c6 | 1294 | 2  | 35.10 | 15.54 | 2322 | 7.56 | <b>1235</b> | 2159 | 65.4  | 45.3 | 0.86 | 1256 |
| c6 | 1294 | 3  | 35.10 | 15.68 | 2322 | 7.56 | <b>1236</b> | 2158 | 65.7  | 45.2 | 0.86 | 1257 |
| c6 | 1294 | 4  | 35.10 | 15.42 | 2322 | 7.56 | <b>1234</b> | 2160 | 65.1  | 45.5 | 0.85 | 1255 |
| c6 | 1294 | 5  | 35.10 | 15.33 | 2322 | 7.56 | <b>1234</b> | 2160 | 64.9  | 45.6 | 0.85 | 1255 |
| c6 | 1294 | 6  | 35.10 | 15.54 | 2322 | 7.56 | <b>1235</b> | 2159 | 65.4  | 45.3 | 0.86 | 1256 |
| c6 | 1294 | 7  | 35.10 | 15.41 | 2322 | 7.56 | <b>1234</b> | 2160 | 65.1  | 45.5 | 0.85 | 1255 |
| c6 | 1294 | 8  | 35.10 | 15.47 | 2322 | 7.56 | <b>1234</b> | 2159 | 65.3  | 45.4 | 0.86 | 1256 |
| c6 | 1294 | 9  | 35.10 | 15.36 | 2322 | 7.56 | <b>1234</b> | 2160 | 65.0  | 45.5 | 0.85 | 1255 |

|     |      |    |       |       |      |      |             |      |      |      |      |      |
|-----|------|----|-------|-------|------|------|-------------|------|------|------|------|------|
| c6  | 1294 | 10 | 35.10 | 15.33 | 2322 | 7.56 | <b>1234</b> | 2160 | 64.9 | 45.6 | 0.85 | 1255 |
| c6  | 1294 | 11 | 35.10 | 15.50 | 2322 | 7.56 | <b>1235</b> | 2159 | 65.3 | 45.4 | 0.86 | 1256 |
| c6  | 1294 | 12 | 35.10 | 15.70 | 2322 | 7.56 | <b>1236</b> | 2158 | 65.8 | 45.1 | 0.86 | 1258 |
| c6  | 1294 | 13 | 35.10 | 15.60 | 2322 | 7.56 | <b>1235</b> | 2159 | 65.6 | 45.3 | 0.86 | 1257 |
| c6  | 1294 | 14 | 35.10 | 15.50 | 2322 | 7.56 | <b>1235</b> | 2159 | 65.3 | 45.4 | 0.86 | 1256 |
| c12 | 1294 | 0  | 35.10 | 15.50 | 2322 | 7.57 | <b>1205</b> | 2156 | 66.7 | 44.3 | 0.87 | 1225 |
| c12 | 1294 | 1  | 35.10 | 15.45 | 2322 | 7.57 | <b>1204</b> | 2156 | 66.6 | 44.3 | 0.87 | 1225 |
| c12 | 1294 | 2  | 35.10 | 15.54 | 2322 | 7.54 | <b>1297</b> | 2166 | 62.7 | 47.6 | 0.82 | 1320 |
| c12 | 1294 | 3  | 35.10 | 15.68 | 2322 | 7.52 | <b>1363</b> | 2172 | 60.3 | 49.8 | 0.79 | 1387 |
| c12 | 1294 | 4  | 35.10 | 15.42 | 2322 | 7.53 | <b>1329</b> | 2170 | 61.1 | 48.9 | 0.80 | 1352 |
| c12 | 1294 | 5  | 35.10 | 15.33 | 2322 | 7.53 | <b>1328</b> | 2170 | 60.9 | 49.1 | 0.80 | 1351 |
| c12 | 1294 | 6  | 35.10 | 15.54 | 2322 | 7.53 | <b>1329</b> | 2169 | 61.3 | 48.8 | 0.80 | 1353 |
| c12 | 1294 | 7  | 35.10 | 15.41 | 2322 | 7.53 | <b>1329</b> | 2170 | 61.1 | 49.0 | 0.80 | 1351 |
| c12 | 1294 | 8  | 35.10 | 15.47 | 2322 | 7.53 | <b>1329</b> | 2169 | 61.2 | 48.9 | 0.80 | 1352 |
| c12 | 1294 | 9  | 35.10 | 15.36 | 2322 | 7.53 | <b>1328</b> | 2170 | 60.9 | 49.0 | 0.80 | 1351 |
| c12 | 1294 | 10 | 35.10 | 15.33 | 2322 | 7.53 | <b>1328</b> | 2170 | 60.9 | 49.1 | 0.80 | 1351 |
| c12 | 1294 | 11 | 35.10 | 15.50 | 2322 | 7.54 | <b>1297</b> | 2166 | 62.6 | 47.7 | 0.82 | 1319 |
| c12 | 1294 | 12 | 35.10 | 15.70 | 2322 | 7.53 | <b>1331</b> | 2168 | 61.7 | 48.6 | 0.81 | 1354 |
| c12 | 1294 | 13 | 35.10 | 15.60 | 2322 | 7.53 | <b>1330</b> | 2169 | 61.5 | 48.7 | 0.81 | 1353 |
| c12 | 1294 | 14 | 35.10 | 15.50 | 2322 | 7.54 | <b>1297</b> | 2166 | 62.6 | 47.7 | 0.82 | 1319 |
| c11 | 1294 | 0  | 35.10 | 15.50 | 2322 | 7.57 | <b>1205</b> | 2156 | 66.7 | 44.3 | 0.87 | 1225 |
| c11 | 1294 | 1  | 35.10 | 15.45 | 2322 | 7.57 | <b>1204</b> | 2156 | 66.6 | 44.3 | 0.87 | 1225 |
| c11 | 1294 | 2  | 35.10 | 15.54 | 2322 | 7.54 | <b>1297</b> | 2166 | 62.7 | 47.6 | 0.82 | 1320 |
| c11 | 1294 | 3  | 35.10 | 15.68 | 2322 | 7.52 | <b>1363</b> | 2172 | 60.3 | 49.8 | 0.79 | 1387 |
| c11 | 1294 | 4  | 35.10 | 15.42 | 2322 | 7.52 | <b>1362</b> | 2173 | 59.8 | 50.2 | 0.78 | 1385 |
| c11 | 1294 | 5  | 35.10 | 15.33 | 2322 | 7.54 | <b>1296</b> | 2167 | 62.2 | 47.9 | 0.81 | 1318 |
| c11 | 1294 | 6  | 35.10 | 15.54 | 2322 | 7.53 | <b>1329</b> | 2169 | 61.3 | 48.8 | 0.80 | 1353 |
| c11 | 1294 | 7  | 35.10 | 15.41 | 2322 | 7.54 | <b>1296</b> | 2166 | 62.4 | 47.8 | 0.82 | 1319 |
| c11 | 1294 | 8  | 35.10 | 15.47 | 2322 | 7.54 | <b>1297</b> | 2166 | 62.5 | 47.7 | 0.82 | 1319 |
| c11 | 1294 | 9  | 35.10 | 15.36 | 2322 | 7.53 | <b>1328</b> | 2170 | 60.9 | 49.0 | 0.80 | 1351 |
| c11 | 1294 | 10 | 35.10 | 15.33 | 2322 | 7.53 | <b>1328</b> | 2170 | 60.9 | 49.1 | 0.80 | 1351 |
| c11 | 1294 | 11 | 35.10 | 15.50 | 2322 | 7.54 | <b>1297</b> | 2166 | 62.6 | 47.7 | 0.82 | 1319 |
| c11 | 1294 | 12 | 35.10 | 15.70 | 2322 | 7.53 | <b>1331</b> | 2168 | 61.7 | 48.6 | 0.81 | 1354 |
| c11 | 1294 | 13 | 35.10 | 15.60 | 2322 | 7.53 | <b>1330</b> | 2169 | 61.5 | 48.7 | 0.81 | 1353 |
| c11 | 1294 | 14 | 35.10 | 15.50 | 2322 | 7.55 | <b>1265</b> | 2163 | 63.9 | 46.5 | 0.84 | 1287 |
