# Supplementary material for: Sensitivity towards elevated p CO 2 in great scallop ( Pecten maximus Lamarck) embryos and fed larvae
Source: Copernicus journal article supplement (doi:10.5194/bg-14-529-2017), 2017-02-03
Supplement: Supplementary file 8 [file bg-14-529-2017-supplement.zip]

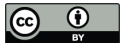

## *Supplement of*

# **Sensitivity towards elevated $p\text{CO}_2$ in great scallop (*Pecten maximus* Lamarck) embryos and fed larvae**

**Sissel Andersen et al.**

*Correspondence to:* Sissel Andersen (sissel.andersen@imr.no)

- bg-14-529-2017-supplement-title-page.pdf
- Andersen\_et\_al-supplement
  - Data-sets
    - \* Fig2-Survival-rawdata.pdf
    - \* Fig3-Development-rawdata.pdf
    - \* Fig4-shell\_length-rawdata.pdf
    - \* Fig5-Shell\_category-rawdata.pdf
    - \* Water\_chemistry-rawdata.pdf
  - Figures-data
    - \* Figure2-data.pdf
    - \* Figure3-data.pdf
    - \* Figure4-data.pdf
    - \* Figure5-data.pdf

The copyright of individual parts of the supplement might differ from the CC-BY 3.0 licence.
