# Supplementary material for: Sensitivity towards elevated p CO 2 in great scallop ( Pecten maximus Lamarck) embryos and fed larvae
Source: Copernicus journal article supplement (doi:10.5194/bg-14-529-2017), 2017-02-03
Supplement: Supplementary file 9 [file bg-14-529-2017-supplement.zip]

| Day | pH   | Tank | Valid<br>N | Mean<br>µm | Confidence -<br>95.000% | Confidence<br>95.000% | Median<br>µm | Minimum<br>µm | Maximum<br>µm | Lower<br>quartile | Upper<br>quartile | Std.Dev. |
|-----|------|------|------------|------------|-------------------------|-----------------------|--------------|---------------|---------------|-------------------|-------------------|----------|
| 3   | 465  | c1   | 92         | 110.0      | 109.0                   | 111.1                 | 110.5        | 84.6          | 119.8         | 107.7             | 113.1             | 4.9      |
| 3   | 465  | c2   | 97         | 111.0      | 110.1                   | 111.9                 | 111.4        | 99.1          | 121.0         | 108.2             | 113.8             | 4.2      |
| 3   | 465  | c3   | 93         | 109.8      | 108.6                   | 110.9                 | 110.8        | 86.7          | 118.5         | 107.8             | 113.2             | 5.6      |
| 3   | 465  | c4   | 96         | 110.7      | 110.0                   | 111.5                 | 110.9        | 102.0         | 118.9         | 107.6             | 113.7             | 3.7      |
| 3   | 768  | c7   | 94         | 108.6      | 107.7                   | 109.5                 | 109.0        | 98.1          | 117.7         | 105.3             | 111.8             | 4.6      |
| 3   | 768  | c8   | 95         | 108.5      | 107.6                   | 109.4                 | 108.9        | 93.8          | 117.1         | 106.4             | 111.7             | 4.4      |
| 3   | 768  | c9   | 97         | 106.8      | 105.7                   | 107.9                 | 107.3        | 83.3          | 115.5         | 104.4             | 110.7             | 5.4      |
| 3   | 768  | c10  | 95         | 106.6      | 105.6                   | 107.6                 | 107.3        | 93.8          | 120.5         | 103.4             | 109.6             | 5.0      |
| 3   | 1294 | c5   | 63         | 95.6       | 93.4                    | 97.8                  | 94.1         | 79.5          | 116.7         | 91.1              | 100.0             | 8.7      |
| 3   | 1294 | c6   | 70         | 93.0       | 91.6                    | 94.4                  | 94.0         | 75.6          | 103.8         | 88.7              | 97.3              | 5.9      |
| 3   | 1294 | c11  | 61         | 94.6       | 92.8                    | 96.3                  | 95.0         | 70.7          | 108.1         | 91.9              | 98.1              | 6.8      |
| 3   | 1294 | c12  | 51         | 96.0       | 94.1                    | 97.8                  | 96.5         | 80.3          | 108.0         | 92.8              | 101.5             | 6.7      |
| 7   | 465  | c1   | 95         | 120.8      | 119.7                   | 121.9                 | 121.2        | 106.8         | 136.4         | 117.6             | 124.8             | 5.4      |
| 7   | 465  | c2   | 96         | 118.7      | 117.5                   | 119.8                 | 119.8        | 104.1         | 130.5         | 114.0             | 122.2             | 5.7      |
| 7   | 465  | c3   | 96         | 119.4      | 117.9                   | 120.9                 | 120.0        | 97.9          | 135.5         | 115.8             | 124.6             | 7.4      |
| 7   | 465  | c4   | 98         | 118.0      | 116.9                   | 119.2                 | 117.7        | 98.1          | 129.6         | 114.3             | 122.4             | 5.9      |
| 7   | 768  | c7   | 89         | 113.5      | 112.1                   | 114.9                 | 114.3        | 95.6          | 126.3         | 109.5             | 117.8             | 6.9      |
| 7   | 768  | c8   | 67         | 114.9      | 113.3                   | 116.5                 | 115.7        | 97.5          | 128.0         | 110.7             | 119.6             | 6.5      |
| 7   | 768  | c9   | 77         | 115.0      | 113.6                   | 116.4                 | 115.7        | 94.2          | 125.3         | 111.5             | 119.0             | 6.1      |
| 7   | 768  | c10  | 97         | 116.4      | 115.3                   | 117.5                 | 117.0        | 102.1         | 127.7         | 112.9             | 120.8             | 5.5      |
| 7   | 1294 | c5   | 79         | 95.4       | 92.0                    | 98.7                  | 98.2         | 63.8          | 127.3         | 82.7              | 107.6             | 14.9     |
| 7   | 1294 | c6   | 89         | 106.8      | 104.8                   | 108.8                 | 106.5        | 82.2          | 127.3         | 100.0             | 114.4             | 9.6      |
| 7   | 1294 | c11  | 95         | 110.9      | 108.8                   | 113.0                 | 112.6        | 75.2          | 128.0         | 108.4             | 117.2             | 10.2     |
| 7   | 1294 | c12  | 84         | 107.3      | 105.9                   | 108.7                 | 107.8        | 91.3          | 122.0         | 102.5             | 111.1             | 6.5      |
| 14  | 465  | c1   | 139.0      | 135.8      | 133.9                   | 137.8                 | 136.9        | 106.0         | 161.9         | 126.5             | 144.2             | 11.7     |
| 14  | 465  | c2   | 156.0      | 135.5      | 133.6                   | 137.3                 | 134.5        | 108.7         | 166.6         | 127.9             | 144.4             | 11.5     |
| 14  | 465  | c3   | 152.0      | 133.8      | 132.1                   | 135.6                 | 133.2        | 109.8         | 168.2         | 126.0             | 141.3             | 10.9     |
| 14  | 465  | c4   | 92.0       | 132.3      | 130.1                   | 134.6                 | 130.1        | 109.8         | 161.0         | 124.1             | 140.2             | 10.9     |
| 14  | 768  | c7   | 166.0      | 123.1      | 121.8                   | 124.4                 | 122.6        | 96.9          | 144.5         | 117.5             | 129.1             | 8.4      |
| 14  | 768  | c8   | 127.0      | 123.9      | 122.5                   | 125.3                 | 124.4        | 104.5         | 141.7         | 118.3             | 130.3             | 8.1      |
| 14  | 768  | c9   | 98.0       | 122.9      | 121.2                   | 124.5                 | 121.8        | 107.3         | 157.9         | 116.6             | 128.6             | 8.4      |
| 14  | 768  | c10  | 102.0      | 124.8      | 123.0                   | 126.5                 | 124.6        | 102.7         | 144.2         | 118.6             | 131.6             | 9.0      |
| 14  | 1294 | c5   | 93.0       | 121.0      | 119.1                   | 122.9                 | 121.0        | 94.2          | 144.2         | 115.2             | 126.6             | 9.3      |
| 14  | 1294 | c6   | 97.0       | 125.8      | 123.8                   | 127.8                 | 126.2        | 101.8         | 151.3         | 119.5             | 131.7             | 10.0     |
| 14  | 1294 | c11  | 176.0      | 122.9      | 121.5                   | 124.3                 | 123.3        | 95.7          | 149.1         | 117.7             | 129.2             | 9.3      |
| 14  | 1294 | c12  | 152.0      | 121.0      | 119.2                   | 122.7                 | 122.1        | 89.8          | 151.9         | 115.4             | 126.7             | 10.9     |
