# Supplementary material for: Sensitivity towards elevated p CO 2 in great scallop ( Pecten maximus Lamarck) embryos and fed larvae
Source: Copernicus journal article supplement (doi:10.5194/bg-14-529-2017), 2017-02-03
Supplement: Supplementary file 10 [file bg-14-529-2017-supplement.zip]

| Day | $p$ CO <sub>2</sub> (μatm) | Shell length (μm) |     |
|-----|----------------------------|-------------------|-----|
|     |                            | Mean              | SD  |
| 3   | 465                        | 110.4             | 0.6 |
| 3   | 768                        | 107.6             | 1.1 |
| 3   | 1294                       | 94.8              | 1.3 |
| 7   | 465                        | 119.2             | 1.2 |
| 7   | 768                        | 114.9             | 1.2 |
| 7   | 1294                       | 105.1             | 6.7 |
| 14  | 465                        | 134.4             | 1.6 |
| 14  | 768                        | 123.7             | 0.9 |
| 14  | 1294                       | 122.7             | 2.3 |
